# Supplementary material for: Polymeric micelles using cholinium-based ionic liquids for the encapsulation and release of hydrophobic drug molecules
Source: Royal Society of Chemistry journal article supplement (doi:10.1039/d0bm01884h), 2021-01-01
Supplement: d0bm01884h5.pdf [file d0bm01884h5.pdf]

## Supplementary information

### **Polymeric micelles using cholinium-based ionic liquids for the encapsulation and drug release of hydrophobic molecules**

Isabelle S. Kurnik<sup>1</sup>; Natália A. D'Angelo<sup>2</sup>;

Priscila G. Mazzola<sup>2</sup>; Marlus Chorilli<sup>3</sup>; Daniel T. Kamei<sup>4</sup>;

Jorge F. B. Pereira<sup>5\*</sup>; António A. Vicente<sup>6</sup>, and André M. Lopes<sup>2\*</sup>

<sup>1</sup>Department of Engineering of Bioprocesses and Biotechnology, School of Pharmaceutical Sciences, São Paulo State University, Araraquara, SP, Brazil.

<sup>2</sup>Faculty of Pharmaceutical Sciences, University of Campinas, Campinas, SP, Brazil.

<sup>3</sup>Department of Drugs and Medicines, School of Pharmaceutical Sciences, São Paulo State University, Araraquara, SP, Brazil.

<sup>4</sup>Department of Bioengineering, University of California, Los Angeles, CA, USA.

<sup>5</sup>University of Coimbra, CIEPQPF, Department of Chemical Engineering, Coimbra, Portugal.

<sup>6</sup>Centre of Biological Engineering (CEB), University of Minho, Braga, Portugal.

#### **\*Corresponding author:**

Prof. André M. Lopes

amlopes@unicamp.br

Faculty of Pharmaceutical Sciences,

University of Campinas, Brazil.

**Table S1.** Proton nuclear magnetic resonance ( $^1\text{H}$  NMR) spectra of the synthesized ionic liquids.

| Ionic liquids                                                                       | $^1\text{H}$ NMR                                                                                                                                                                                                                                                                                                                                                                                                                                                                          |
|-------------------------------------------------------------------------------------|-------------------------------------------------------------------------------------------------------------------------------------------------------------------------------------------------------------------------------------------------------------------------------------------------------------------------------------------------------------------------------------------------------------------------------------------------------------------------------------------|
| <p style="text-align: center;"><b>Cholinium acetate</b><br/><b>[Ch][Cl]</b></p>     | <p><math>^1\text{H}</math> NMR (600 MHz, <math>\text{D}_2\text{O}</math>) <math>\delta</math> ppm: 1.94 (3H, s, <math>\text{CH}_3\text{CO}</math>), 3.21 (9H, s, <math>3\text{CH}_3\text{N}</math>), 3.53 (2H, m, <math>\text{CH}_2\text{CH}_2\text{OH}</math>), 4.05 (2H, m, <math>\text{CH}_2\text{OH}</math>)</p>                                                                                                                                                                      |
| <p style="text-align: center;"><b>Cholinium propanoate</b><br/><b>[Ch][Pro]</b></p> | <p><math>^1\text{H}</math> NMR (600 MHz, <math>\text{D}_2\text{O}</math>) <math>\delta</math> ppm: 0.91 (3H, t, <math>\text{CH}_3\text{CH}_2</math>, 7.60 Hz), 2.04 (2H, q, <math>\text{CH}_2\text{CO}</math> 7.60 Hz), 3.07 (9H, s, <math>3\text{CH}_3\text{N}</math>), 3.92 (2H, t, <math>\text{CH}_2\text{CH}_2\text{OH}</math>), 3.38 (2H, s, <math>\text{CH}_2\text{OH}</math>)</p>                                                                                                  |
| <p style="text-align: center;"><b>Cholinium butanoate</b><br/><b>[Ch][But]</b></p>  | <p><math>^1\text{H}</math> NMR (600 MHz, <math>\text{D}_2\text{O}</math>) <math>\delta</math> ppm: 0.76 (3H, t, <math>\text{CH}_3\text{CH}_2</math>, 7.47 Hz), 1.43 (2H, m, <math>\text{CH}_3\text{CH}_2</math>), 2.04 (2H, t, <math>\text{CH}_2\text{CO}</math>, 7.47 Hz), 3.07 (9H, s, <math>3\text{CH}_3\text{N}</math>), 3.92 (2H, m, <math>\text{CH}_2\text{CH}_2\text{OH}</math>), 3.38 (2H, s, <math>\text{CH}_2\text{OH}</math>)</p>                                              |
| <p style="text-align: center;"><b>Cholinium hexanoate</b><br/><b>[Ch][Hex]</b></p>  | <p><math>^1\text{H}</math> NMR (600 MHz, <math>\text{DMSO-}d_6</math>) <math>\delta</math> ppm: 0.95 (3H, t, <math>\text{CH}_3\text{CH}_2</math>), 1.24 (4H, m, <math>\text{CH}_3(\text{CH}_2\text{CH}_2)</math>); 1.64 (2H, m, <math>\text{CH}_3\text{CH}_2</math>), 2.16 (2H, q, <math>\text{CH}_2\text{CO}</math>), 3.23 (9H, 2 s, <math>3\text{CH}_3\text{N}</math>), 3.51 (2H, t, <math>\text{CH}_2\text{CH}_2\text{OH}</math>), 4.02 (2H, s, <math>\text{CH}_2\text{OH}</math>)</p> |

**Table S2.** Zeta ( $\zeta$ ) potential determined by dynamic light scattering (DLS) parameters before (blank polymeric micelles PMs) and after curcumin (CCM) encapsulation in 2.0 wt% L35/buffer + ionic liquid (IL)-based ATPMS formulations after 48 h of storage time, under physiological conditions (*i.e.*, PBS buffer pH 7.4 at 37.0°C). Error bars correspond to 95% confidence levels for three independent measurements.

| Systems/<br>Formulations | $\zeta$ potential (mV)                 |                        |
|--------------------------|----------------------------------------|------------------------|
|                          | Before<br>encapsulation<br>(blank PMs) | After<br>encapsulation |
| *Control                 | -5.4 $\pm$ 2.3                         | -1.5 $\pm$ 0.5         |
| 3.0 M [Ch]Cl             | -20.2 $\pm$ 0.6                        | -18.4 $\pm$ 1.0        |
| 2.5 M [Ch][Ac]           | -19.5 $\pm$ 0.5                        | -18.1 $\pm$ 0.5        |
| 2.0 M [Ch][Pro]          | -19.1 $\pm$ 1.2                        | -17.2 $\pm$ 0.6        |
| 1.2 M [Ch][But]          | -17.2 $\pm$ 0.8                        | -15.4 $\pm$ 0.4        |
| 0.2 M [Ch][Hex]          | -16.6 $\pm$ 0.5                        | -14.6 $\pm$ 1.0        |

\*Control corresponds to samples of polymeric micelles without ionic liquids in the formulation.

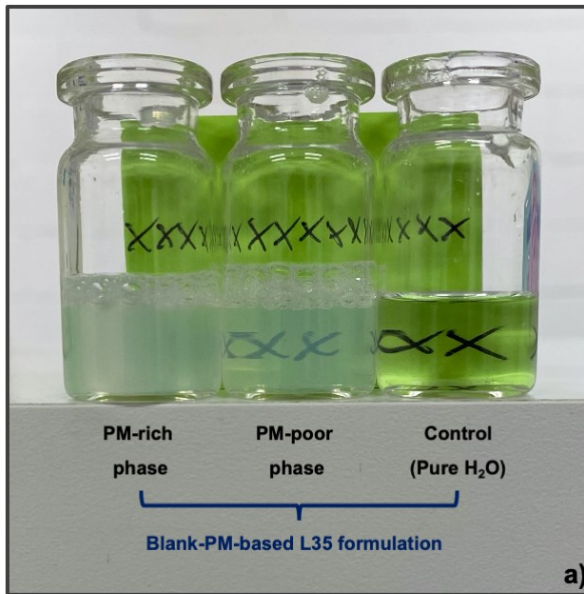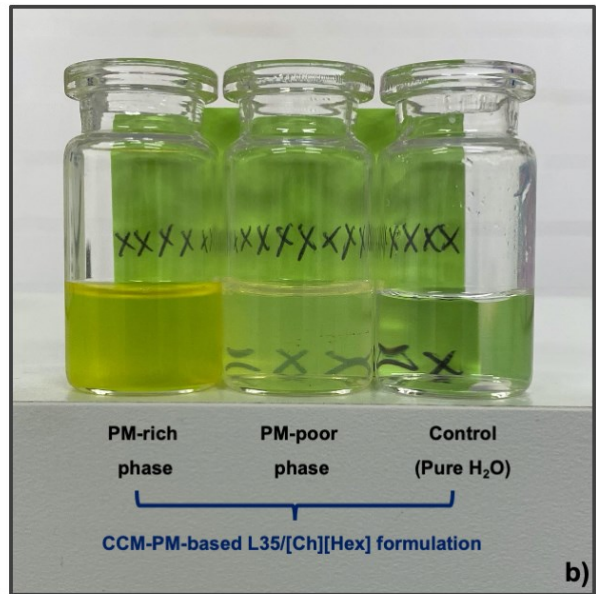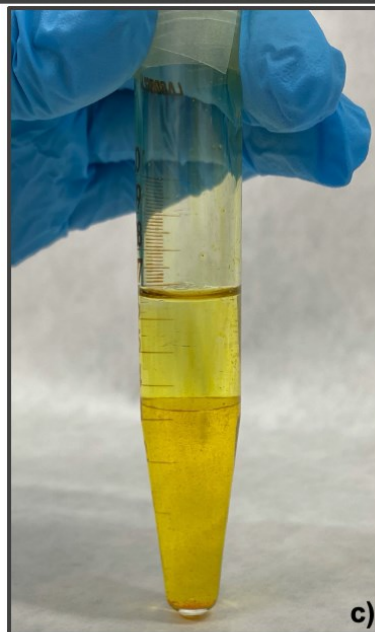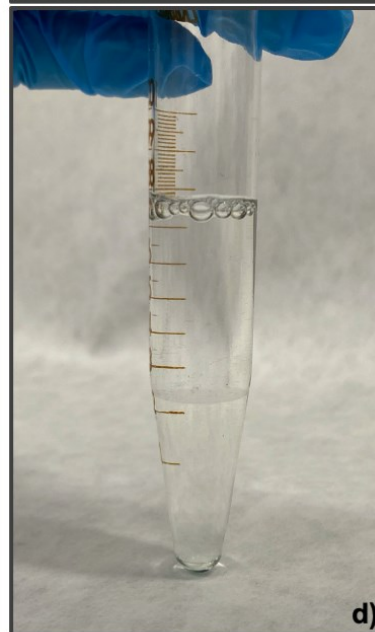

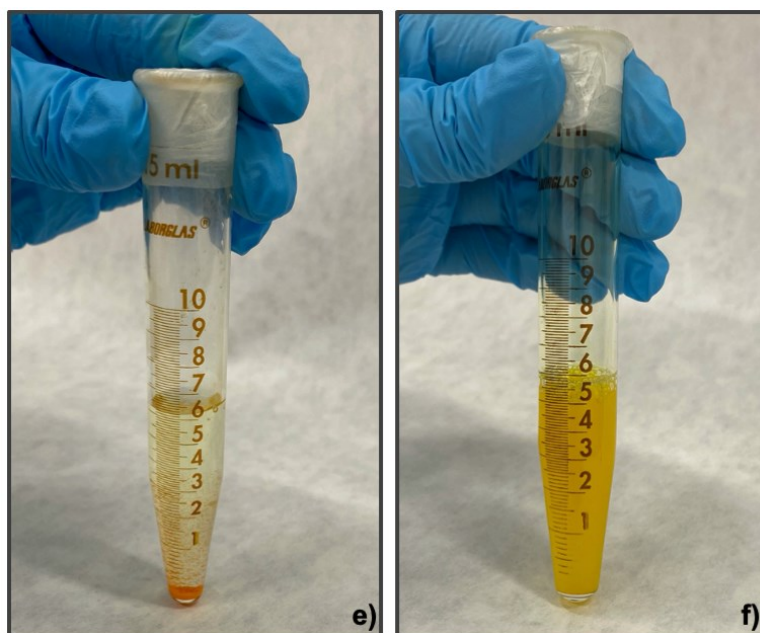

**Figure S1.** PM-based L35/0.2 M [Ch][Hex] phases (a) without CCM and (b) with CCM. The top and bottom phases are the PM-poor and PM-rich phases, respectively, in (c) and (d). CCM is present in (c), but absent in (d). (e) CCM in an aqueous solution where precipitation on the wall and mainly in the bottom of the tube can be observed. (f) CCM completely solubilized in a Pluronic L35 aqueous solution (with 2.0 wt% + 0.2 M [Ch][Hex]) below the LCST.
