# Supplementary figures and images for: Polymeric micelles using cholinium-based ionic liquids for the encapsulation and release of hydrophobic drug molecules
Source: Royal Society of Chemistry journal article supplement (doi:10.1039/d0bm01884h), 2021-01-01

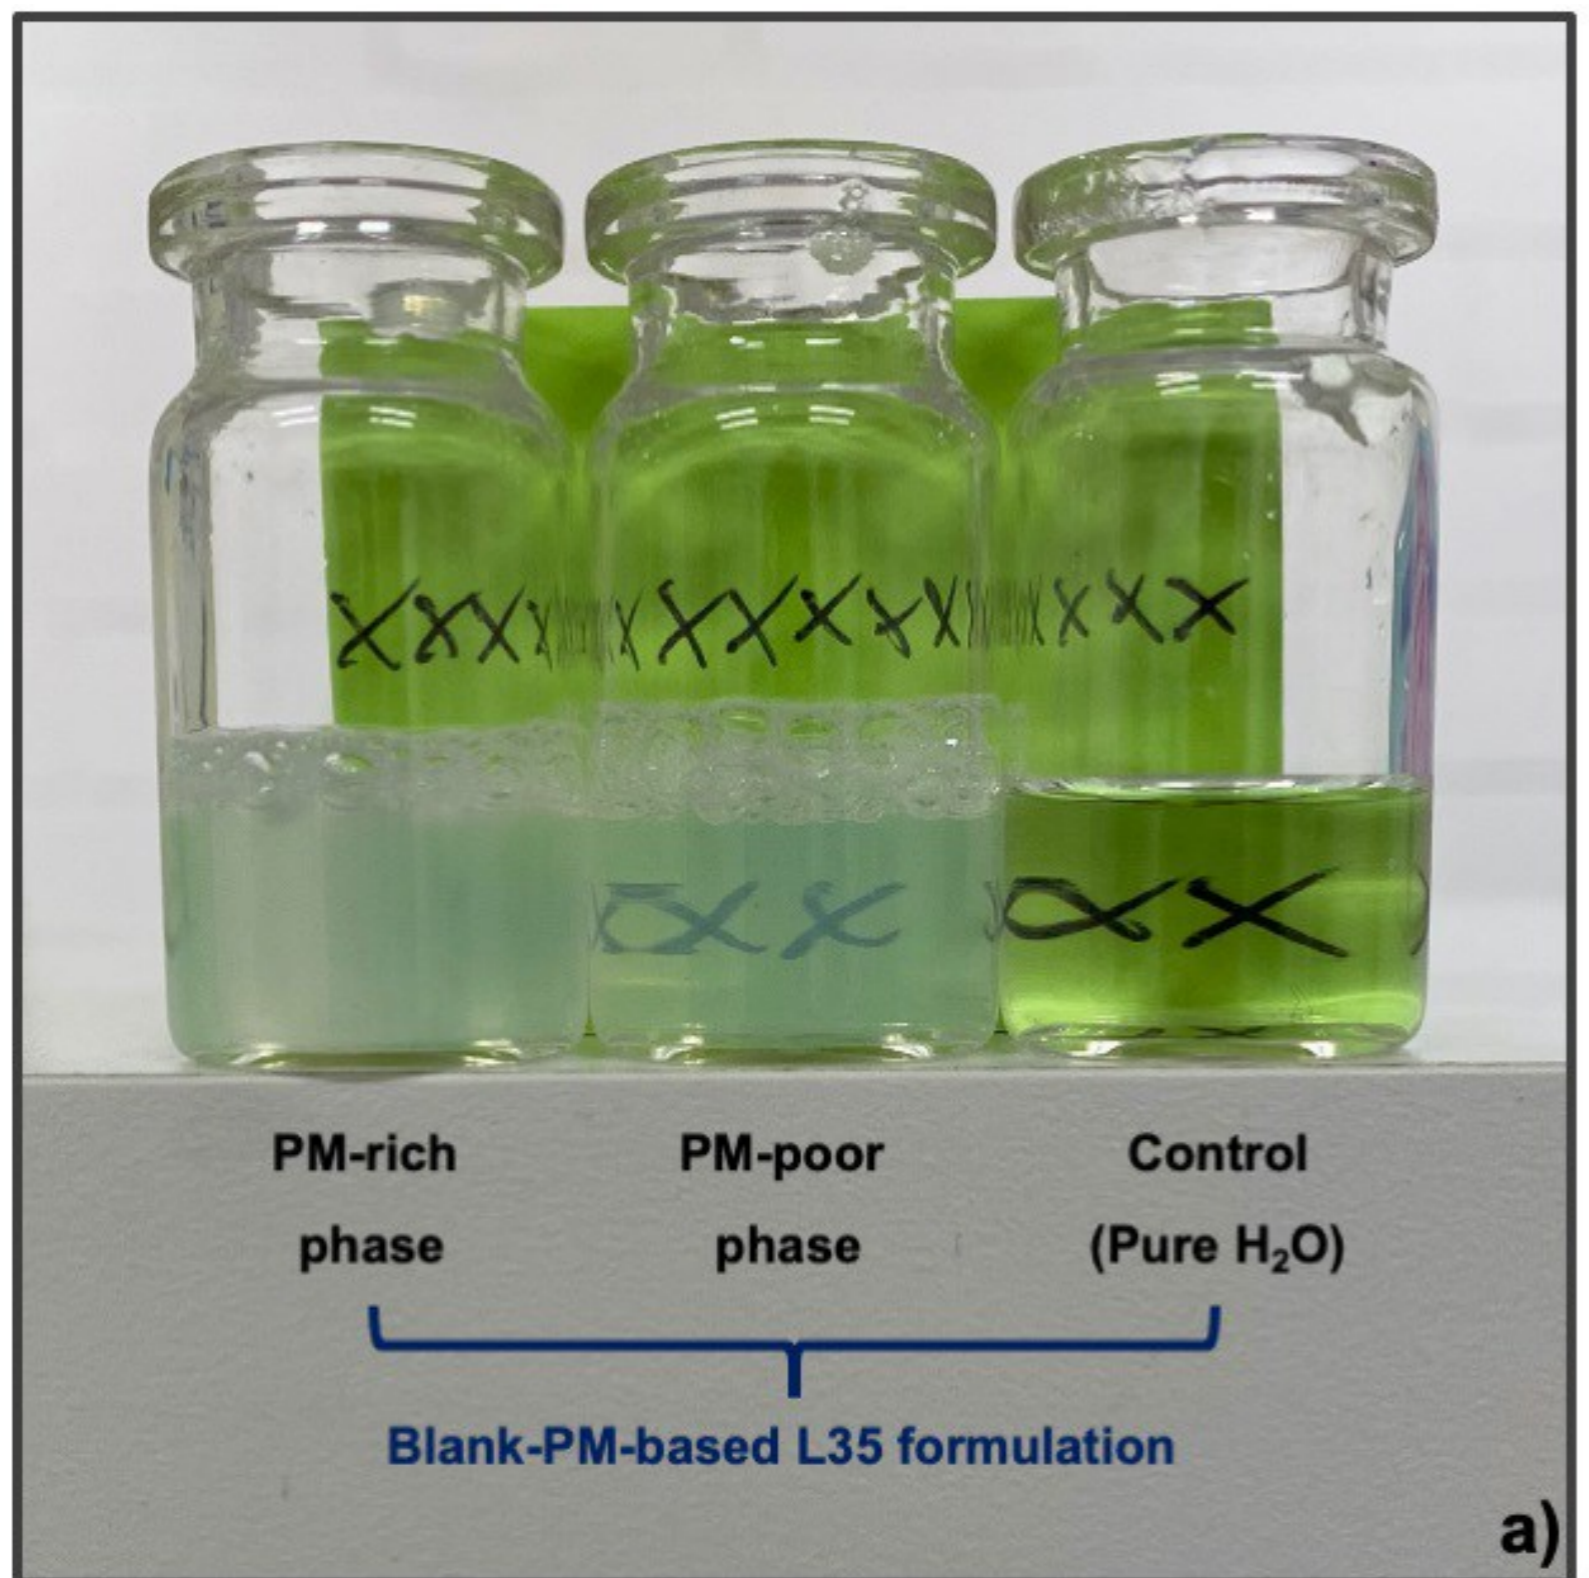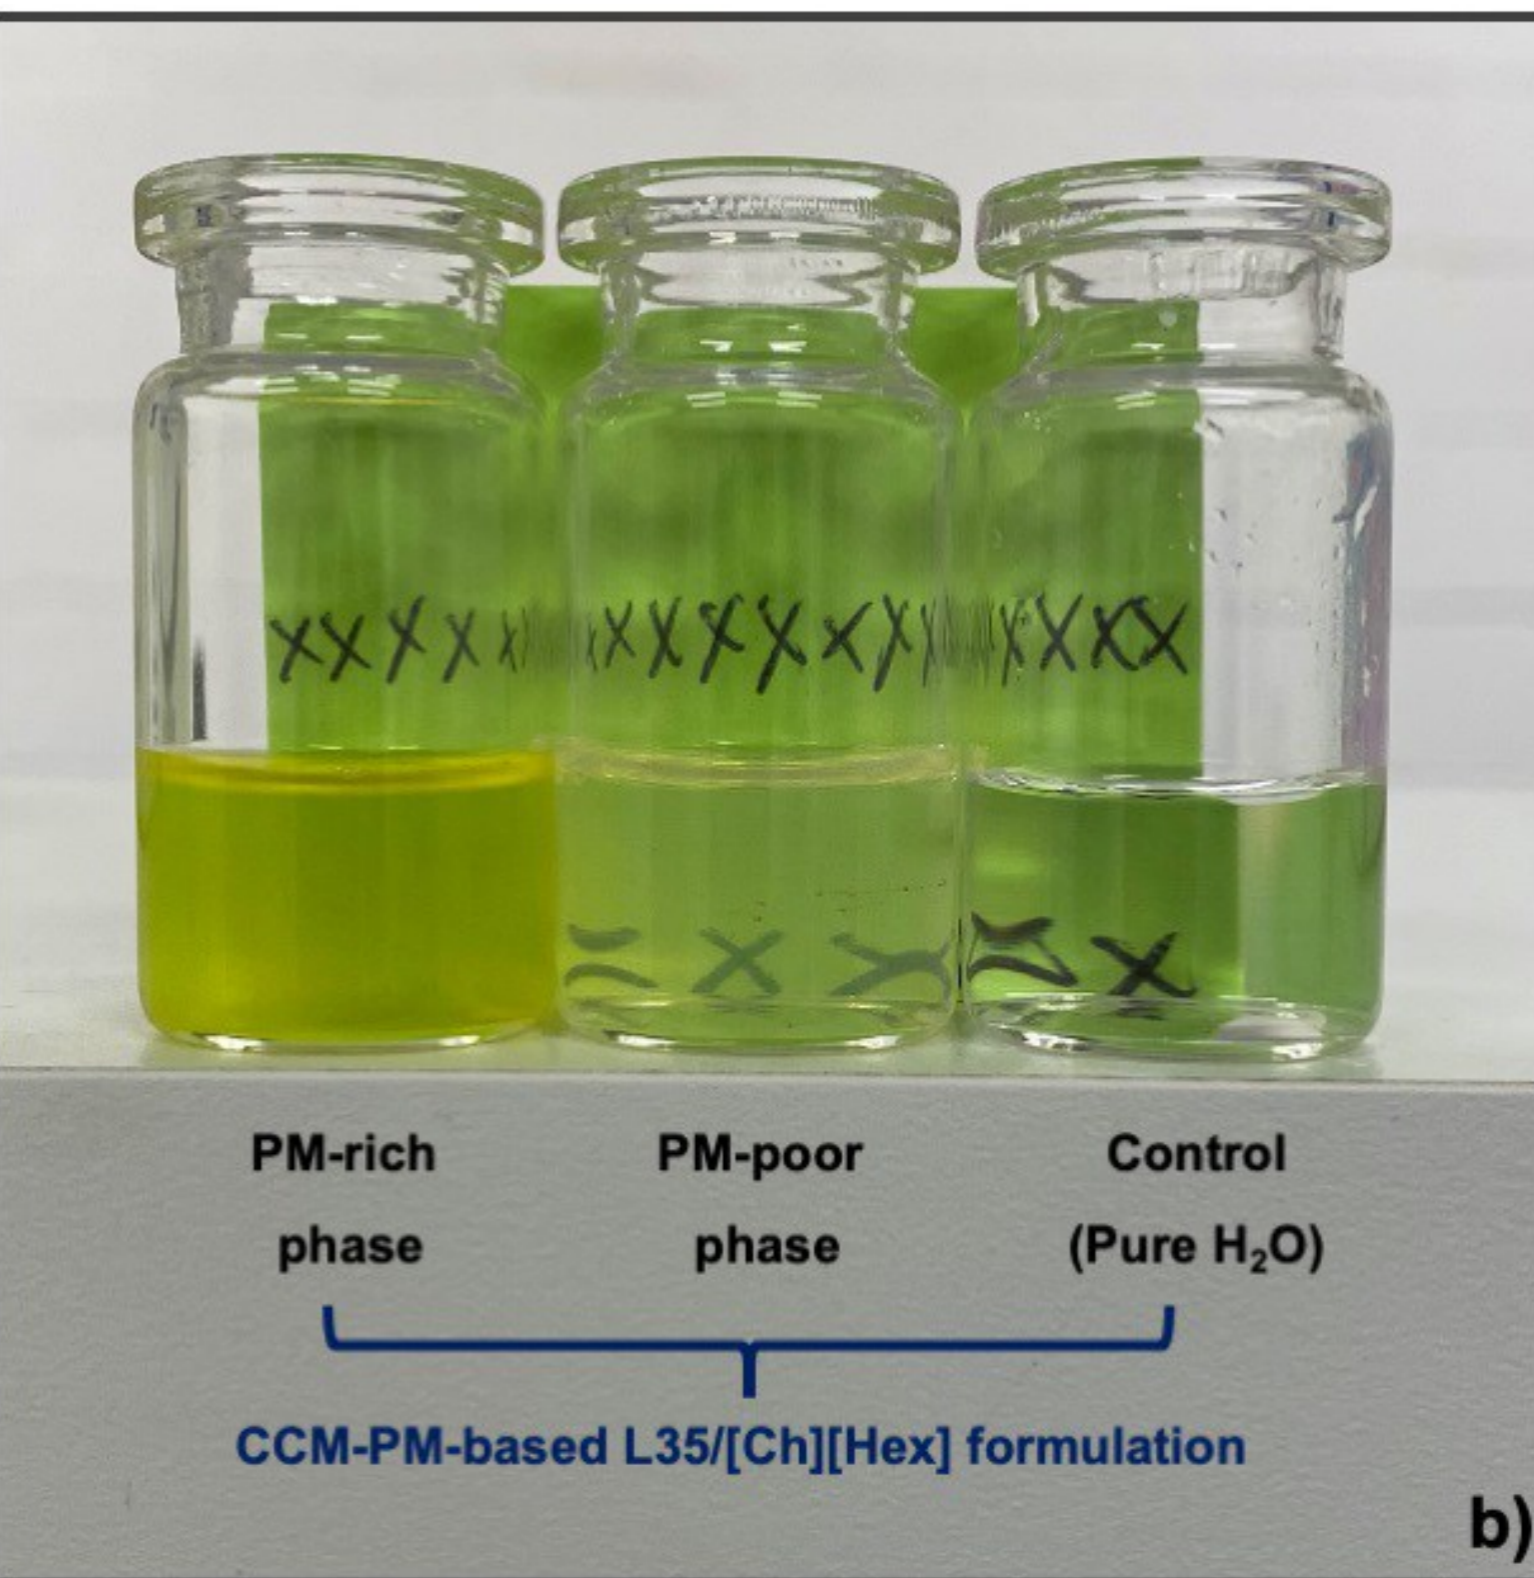

Figures S1a and S1b

Supplement: d0bm01884h2.pdf [file d0bm01884h2.pdf]

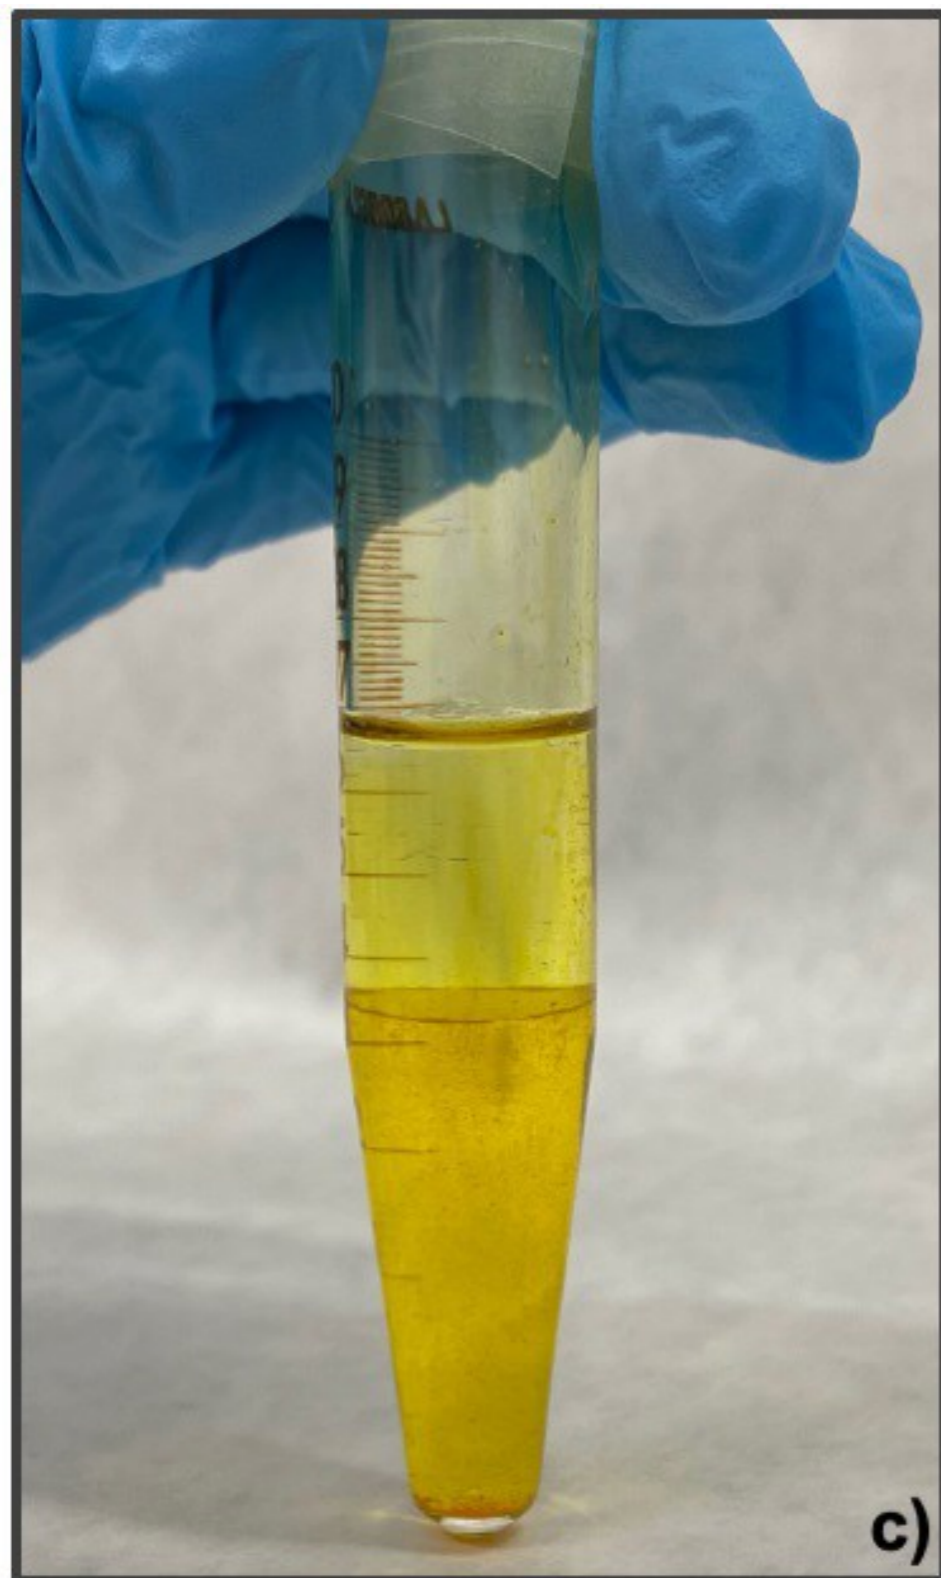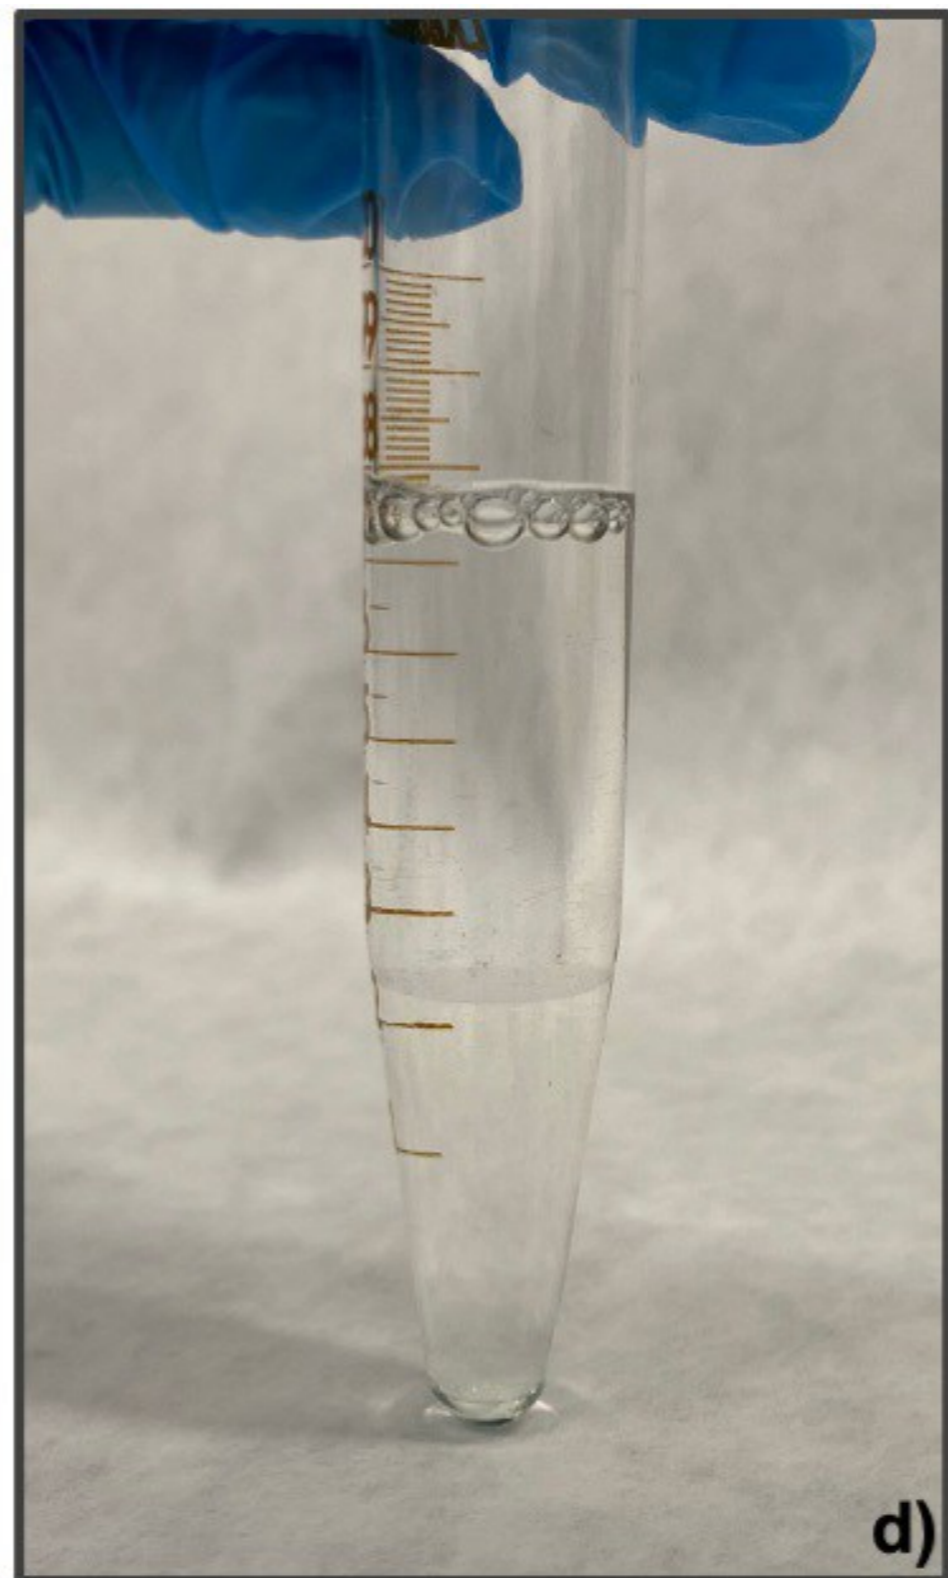

Supplement: d0bm01884h3.pdf [file d0bm01884h3.pdf]

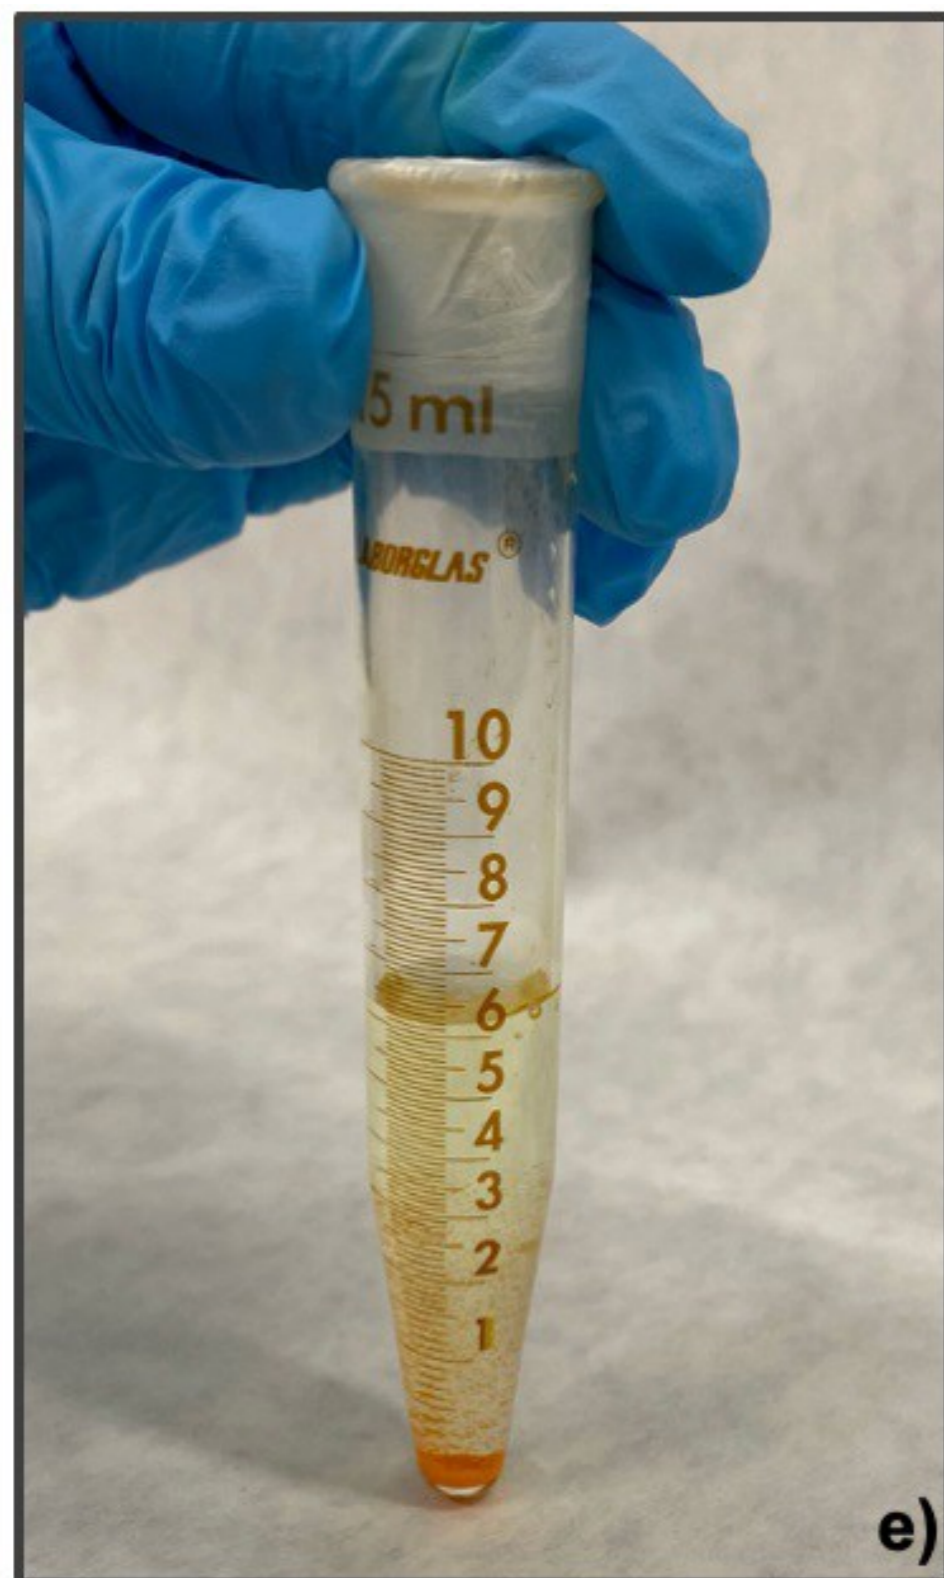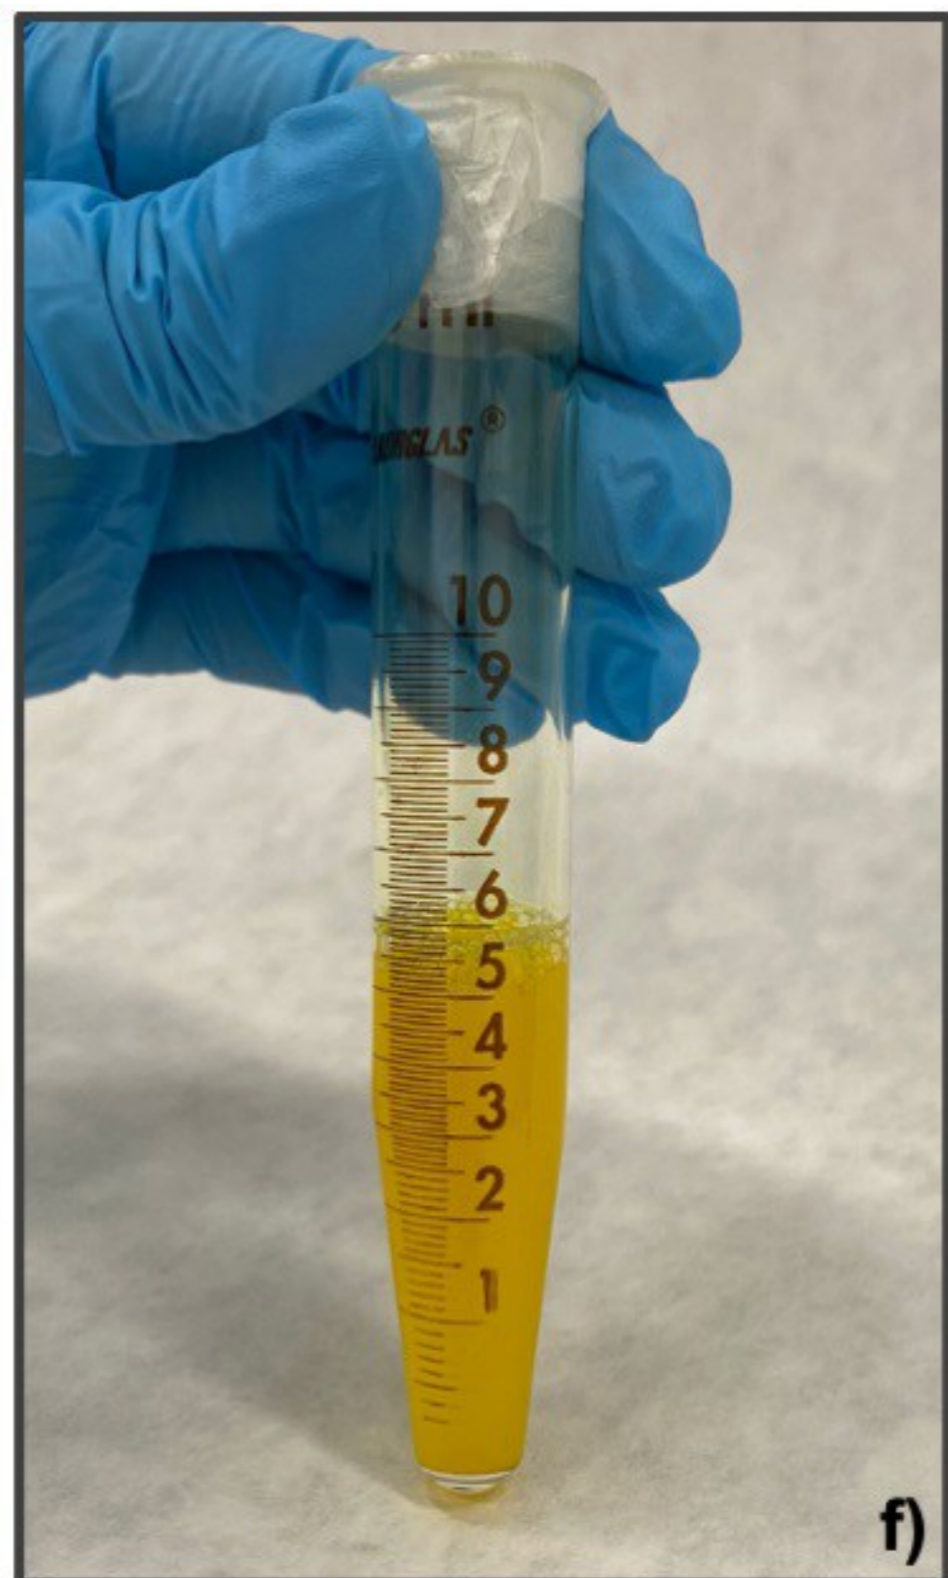

Supplement: d0bm01884h4.pdf [file d0bm01884h4.pdf]
